# Supplementary material for: Testosterone metabolites inhibit proliferation of castration- and therapy-resistant prostate cancer
Source: PubMed Central journal article supplement (PMC5908297; doi:10.18632/oncotarget.24763), 2018-03-30
Supplement: oncotarget-09-16951-s001.pdf [file oncotarget-09-16951-s001.pdf]

## Testosterone metabolites inhibit proliferation of castration- and therapy-resistant prostate cancer

### SUPPLEMENTARY MATERIALS

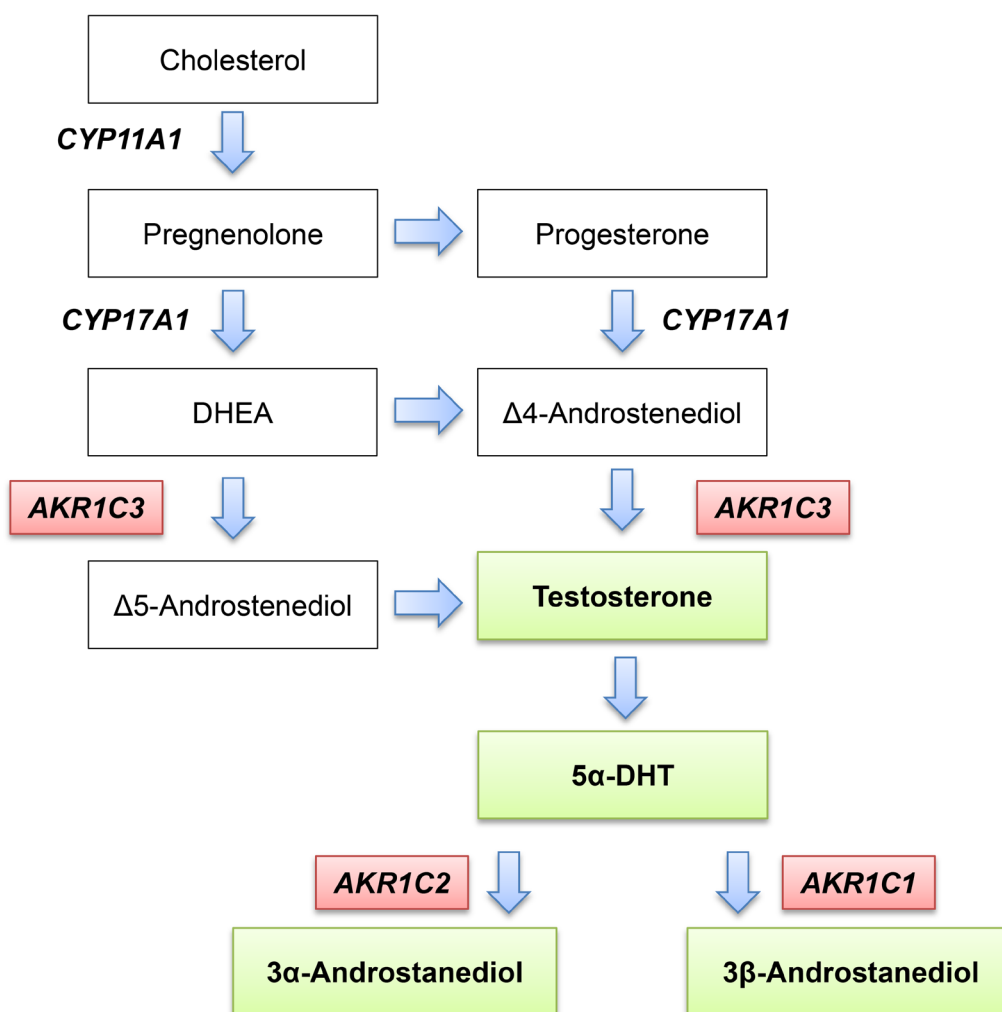

**Supplementary Figure 1: Steroidogenesis in prostate cancer: Androgen receptor (AR) affinity peaks in DHT by 5 $\alpha$ -reductase conversion of testosterone.** 3 $\beta$ -adiol or 3 $\alpha$ -adiol (3 $\beta$ -androstanediol, 3 $\alpha$ -androstanediol) are metabolites of 5 $\alpha$ -DHT, converted by AKR1C1 (3 $\beta$ -adiol) or AKR1C2 (3 $\alpha$ -adiol) with reduced AR-affinity but increased estrogen receptor affinity. Modified from Knudsen and Penning [9].

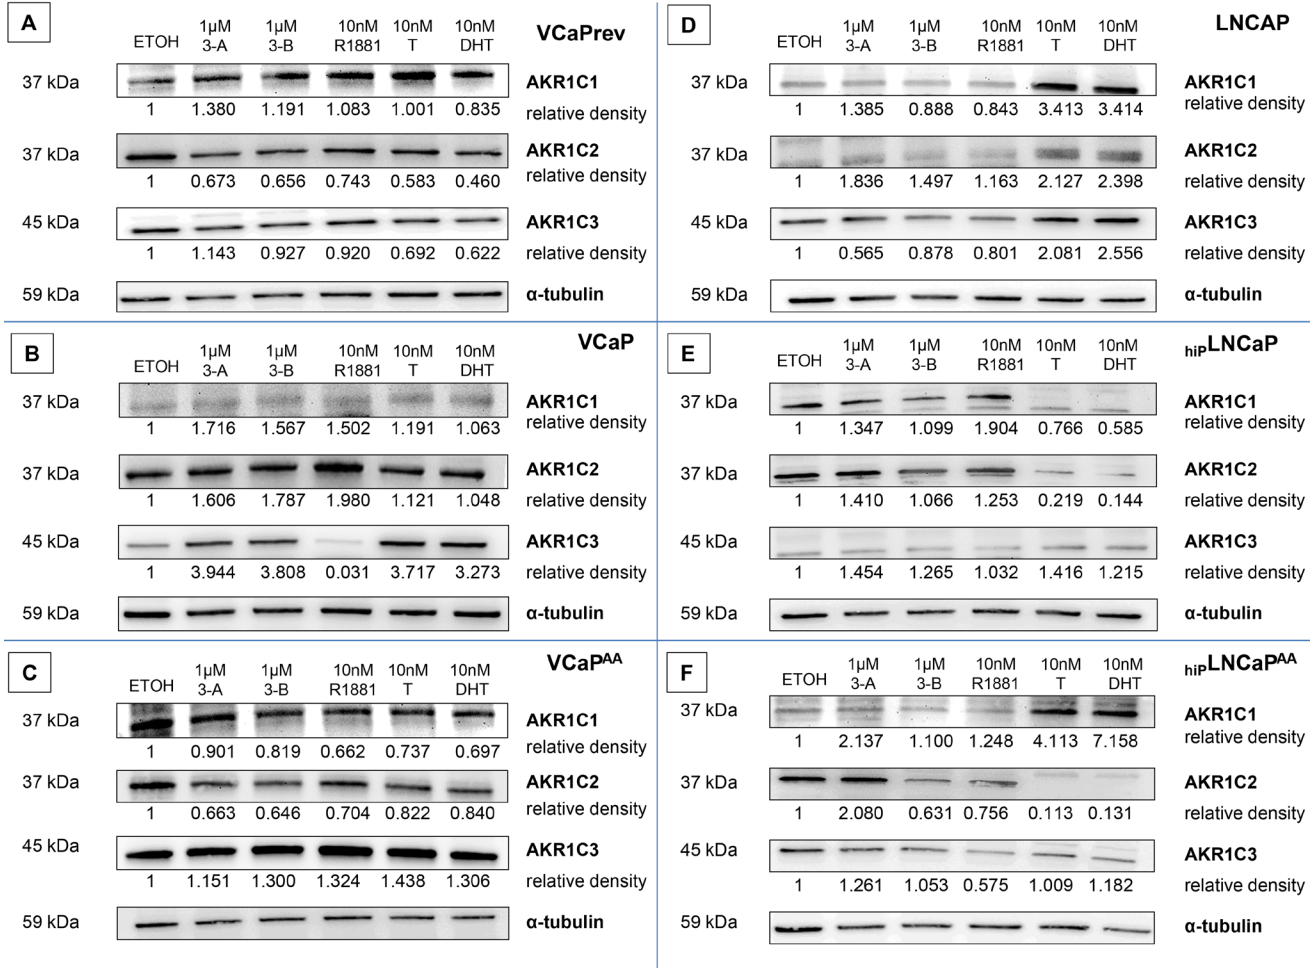

**Supplementary Figure 2: Expression of AKR1C1, AKR1C2, and AKR1C3 in prostate cancer cell lines.** In VCaPrev cells, 1  $\mu$ mol/L 3 $\alpha$ -adiol, 1  $\mu$ mol/L 3 $\beta$ -adiol, 10 nmol/L R1881, 10 nmol/L testosterone, and 10 nmol/L 5 $\alpha$ -DHT resulted in no marked changes in AKR1C1 and AKR1C3 expression, whereas AKR1C2 expression was markedly reduced (A). In VCaP cells, AKR1C1, AKR1C2, and AKR1C3 expression was upregulated after application of 1  $\mu$ mol/L 3 $\alpha$ -adiol, 1  $\mu$ mol/L 3 $\beta$ -adiol, 10 nmol/L testosterone, and 10 nmol/L 5 $\alpha$ -DHT, with the following exception; R1881 had no effect on AKR1C3 (B). VCaP<sup>AA</sup> expressed AKR1C1, AKR1C2, and AKR1C3. Treatment with 1  $\mu$ mol/L 3 $\alpha$ -adiol, 1  $\mu$ mol/L 3 $\beta$ -adiol, 10 nmol/L R1881, 10 nmol/L testosterone, and 10 nmol/L 5 $\alpha$ -DHT effects downregulation of AKR1C1 or AKR1C2 expression and upregulation of AKR1C3 (C). Low expression of AKR1C1 and AKR1C2 and moderate expression of AKR1C3 was observed in LNCaP cells. 3 $\alpha$ -adiol (1  $\mu$ mol/L), 3 $\beta$ -adiol (1  $\mu$ mol/L), and R1881 had various moderate effects on the basal expression of these enzymes, whereas treatment with 10 nmol/L testosterone and 10 nmol/L 5 $\alpha$ -DHT considerably increased AKR1C1, AKR1C2, and AKR1C3 expression (D). In addition, the application of 1  $\mu$ mol/L 3 $\alpha$ -adiol, 1  $\mu$ mol/L 3 $\beta$ -adiol, or 10 nmol/L R1881 resulted in no changes in the expression of AKR1C1, AKR1C2, and AKR1C3. In contrast to that in LNCaP cells, treatment with 10 nmol/L testosterone and 10 nmol/L 5 $\alpha$ -DHT considerably increased the expression of AKR1C1 and AKR1C2 in hiPLNCaP cells. Not all compounds affected AKR1C3 expression (E). In abiraterone acetate-treated hiPLNCaP cells, the most significant effects were from testosterone and 5 $\alpha$ -DHT, in terms of AKR1C1 upregulation and AKR1C3 downregulation (F).

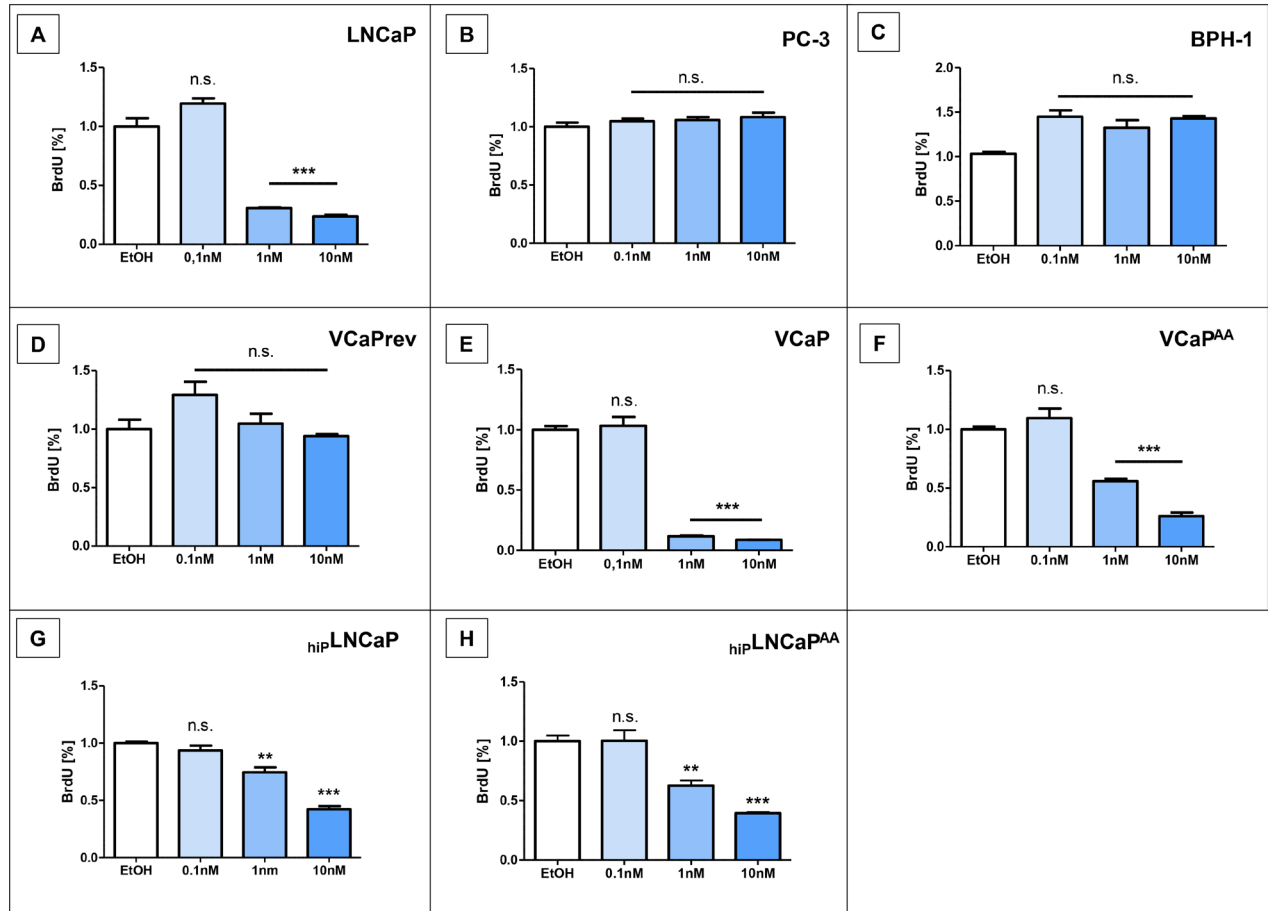

**Supplementary Figure 3: Androgen stimulation in various cell types.** In LNCaP, VCaP, VCaP<sup>AA</sup>, hiPLNCaP, and hiPLNCaP<sup>AA</sup> cells, proliferation, as assessed by BrdU-ELISA, was significantly reduced after treatment with 1–10 nmol/L testosterone (**A**, **E–H**). Testosterone resulted in no changes in proliferation for PC-3 cells and moderate effects for BPH-1 cells (**B** and **C**), and sustained proliferation in testosterone-sensitive prostate cancer cells (**D**) (n.s. = not significant, \* $P < 0.05$ , \*\* $P < 0.005$ , \*\*\* $P < 0.0005$ ).

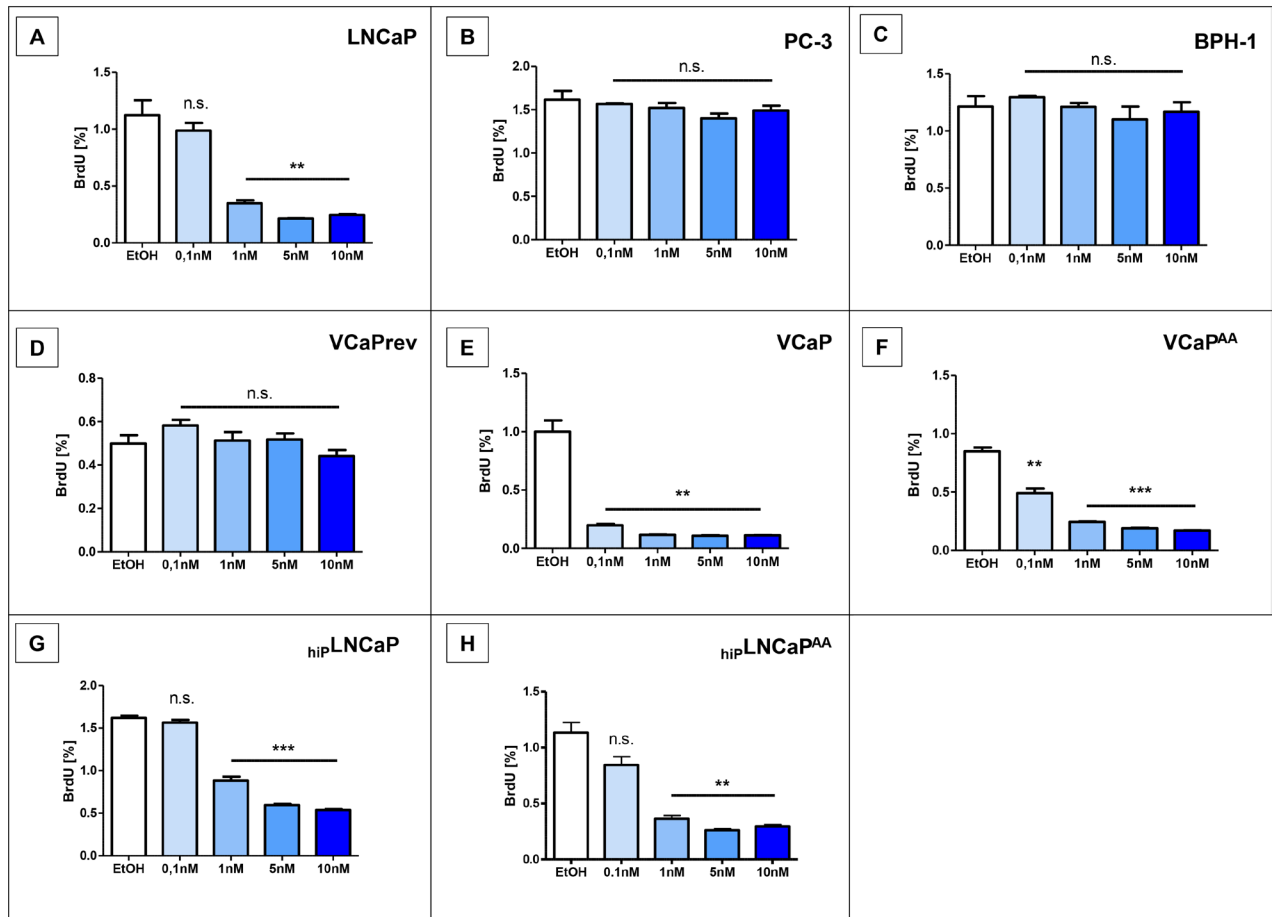

**Supplementary Figure 4: Effects of 5a-DHT on various prostate cancer cells.** Treatment with 1–10 nmol/L 5a-DHT in LNCaP led to a significant reduction in proliferation, as assessed by BrdU-ELISA; 0.1 nmol/L resulted in no reduction in proliferation in LNCaP cells (A). In PC-3, BPH-1, and VCaPrev cells, no changes in proliferation were detected (B–D). Treatment with 0.1 nmol/L, 1 nmol/L, 5 nmol/L, or 10 nmol/L 5a-DHT significantly reduced proliferation in VCaP and VCaPAA cells (E and F). Treatment of HiPLNCaPs resulted in similar effects as treatment of basal LNCaP (G, H) (n.s. = not significant, \* $P < 0.05$ , \*\* $P < 0.005$ , \*\*\* $P < 0.0005$ ).

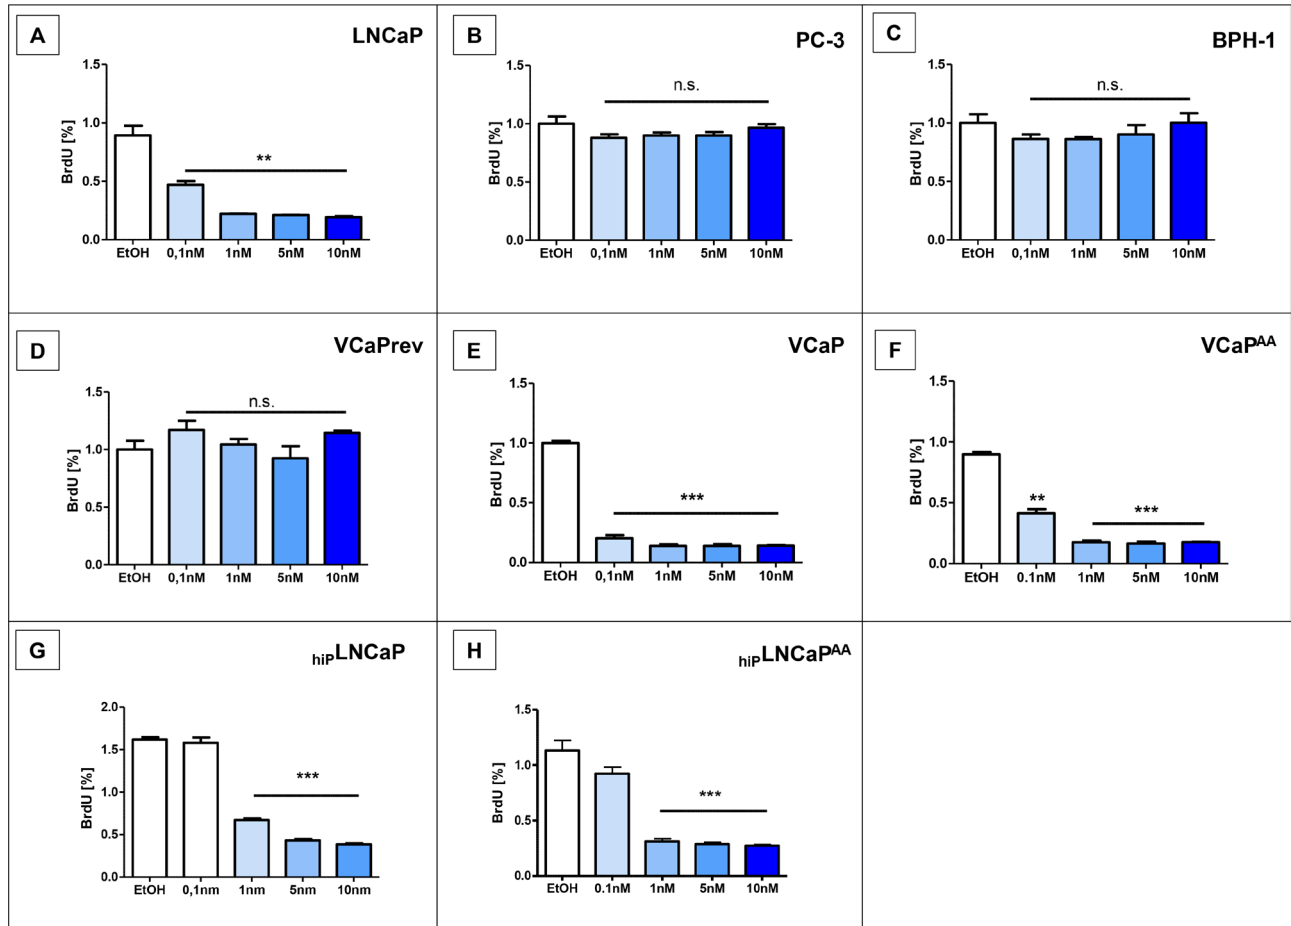

**Supplementary Figure 5: Effects of the non-metabolisable androgen R1881 on various prostate cancer cells.** PCa cells were treated with 0.1 nmol/L, 1 nmol/L, 5 nmol/L, and 10 nmol/L R1881. Proliferation of LNCaP, VCaP, VCaPAA, hiPLNcaP, and hiPLNcaPAA cells, as assessed by BrdU-ELISA, was comparable to that with testosterone and 5 $\alpha$ -DHT (n.s. = not significant, \* $P < 0.05$ , \*\* $P < 0.005$ , \*\*\* $P < 0.0005$ ).
